# Supplementary material for: Asymmetric Michael addition of aldehydes to nitroalkenes using a primary amino acid lithium salt
Source: Royal Society of Chemistry journal article supplement (doi:10.1039/c003940c), 2010-01-01
Supplement: c003940c.pdf [file c003940c.pdf]

## Electronic Supplementary Information

**Asymmetric Michael addition of aldehydes to nitroalkenes using a primary amino acid lithium salt**

**Masanori Yoshida,\* Atsushi Sato and Shoji Hara**

*Division of Chemical Process Engineering, Graduate School of Engineering,*

*Hokkaido University, Sapporo 060-8628 Japan.*

*Fax: +81 11 706 6557; Tel:+81 11 706 6557;*

*E-mail: myoshida@eng.hokudai.ac.jp*

### **Contents**

(A) General comments

(B) Compound characterization data of Michael adducts

(C) References

### **(A) General comments**

IR spectra were recorded using a JASCO FT/IR-5300 or FT/IR-410 spectrometer.  $^1\text{H}$  NMR (400 MHz) and  $^{13}\text{C}$  NMR (100 MHz) spectra were recorded on a JEOL JNM-A400II or ECX-400P FT NMR. Chemical shifts,  $\delta$  are referred to TMS. EI and ESI high-resolution mass spectra were measured on a JEOL JMS-700TZ or JMS-T100LP spectrometer. Optical rotation was measured by a JASCO DIP-360 or P-2200. Melting points are measured by Yanagimoto micro melting point apparatus and are uncorrected. HPLC was carried out using a JASCO PU-2089 Plus intelligent pump and a UV-2075 Plus UV detector.

## (B) Compound characterization data of the Michael adducts

### (S)-2,2-Dimethyl-4-nitro-3-phenylbutanal (3a)

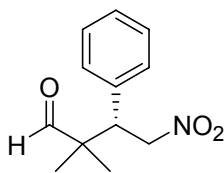

The enantioselectivity was determined by HPLC analysis [98% ee, DAICEL CHIRALCEL OD-H, 10% isopropanol/hexane, 1.0 mL/min, 254 nm;  $t_r$ (major enantiomer) = 33.5 min,  $t_r$ (minor enantiomer) = 21.6 min].

The absolute configuration was determined by comparison of the optical rotation with that of the literature.<sup>1</sup>  $[\alpha]^{26}_D = -4.9^\circ$  ( $c = 1.0$ ,  $\text{CHCl}_3$ ), light yellow oil,  $\delta_H(\text{CDCl}_3)$  1.01 (3H, s), 1.14 (3H, s), 3.79 (1H, dd,  $J$  4.2, 11.3 Hz), 4.69 (1H, dd,  $J$  4.2, 13.1 Hz), 4.86 (1H, dd,  $J$  11.3, 13.1 Hz), 7.20-7.21 (2H, m), 7.30-7.36 (3H, m), 9.53 (1H, s);  $\delta_C(\text{CDCl}_3)$  18.7, 21.5, 48.1, 48.3, 76.2, 128.0, 128.5, 128.9, 135.3, 204.2;  $\nu(\text{neat})/\text{cm}^{-1}$  3065, 3034, 2975, 2934, 2878, 2820, 2720, 1725, 1603, 1555, 1495, 1468, 1456, 1435, 1379, 1337, 1314, 1206, 1159, 1144, 1090, 1032, 1005, 976, 912, 883, 831, 804, 781, 750, 706, 648; [HR EI-MS: Calc. for  $\text{C}_{12}\text{H}_{15}\text{NO}_3$  ( $M$ ): 221.1052. Found:  $M^+$ , 221.1044].

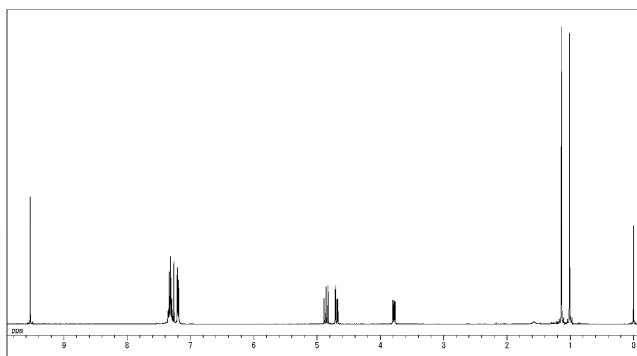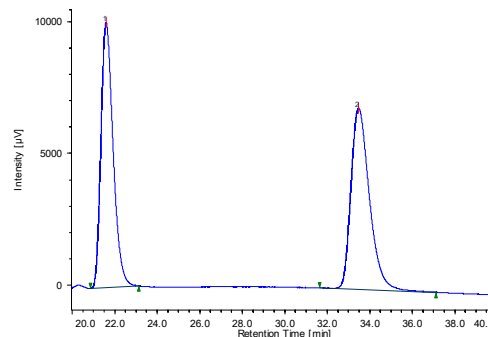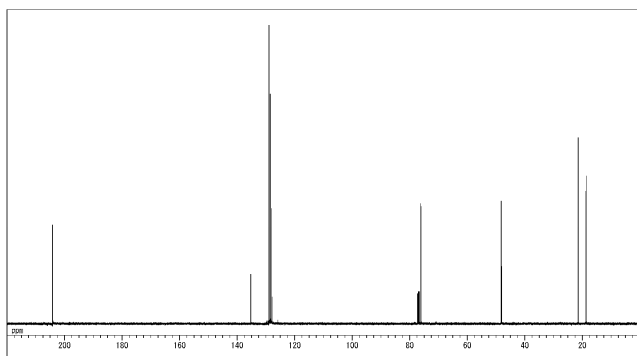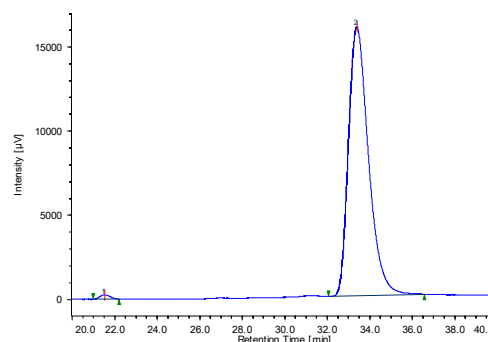

### (S)-2,2-Dimethyl-3-(4-methoxyphenyl)-4-nitrobutanal (3b)

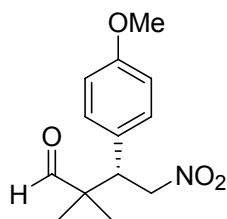

The enantioselectivity was determined by HPLC analysis [98% ee, DAICEL CHIRALCEL OD-H, 10% isopropanol/hexane, 1.0 mL/min, 254 nm;  $t_r$ (major enantiomer) = 35.6 min,  $t_r$ (minor enantiomer) = 22.1 min]. The absolute configuration was determined by comparison of the optical rotation with that of the literature.<sup>1f,g</sup>

$[\alpha]^{26}_D = +1.7^\circ$  ( $c = 1.0$ ,  $\text{CHCl}_3$ ), white solid, Mp. 58-59 °C,  $\delta_H(\text{CDCl}_3)$  1.00 (3H, s), 1.13 (3H, s), 3.73 (1H, dd,  $J$  4.2, 11.5 Hz), 3.79 (3H, s), 4.66 (1H, dd,  $J$  4.2, 12.8 Hz), 4.81 (1H, dd,  $J$  11.5, 12.8 Hz), 6.86 (2H, d,  $J$  8.7 Hz), 7.11 (2H, d,  $J$  8.7 Hz), 9.53 (1H, s);  $\delta_C(\text{CDCl}_3)$  18.7, 21.4, 47.7, 48.2, 55.1, 76.4, 113.9, 126.9, 130.0, 159.2, 204.3;  $\nu(\text{KBr})/\text{cm}^{-1}$  2976, 2919, 2841, 2718, 1725, 1611, 1582, 1553, 1516, 1468, 1441, 1379, 1290, 1250, 1188, 1119, 1028, 889, 839, 812, 747, 635; [HR EI-MS: Calc. for  $\text{C}_{13}\text{H}_{17}\text{NO}_4$  ( $M$ ): 251.1158. Found:  $M^+$ , 251.1152].

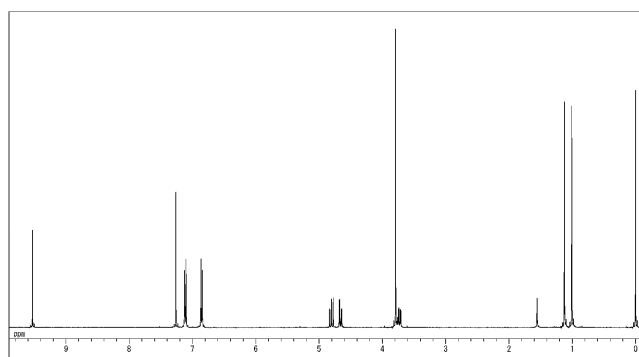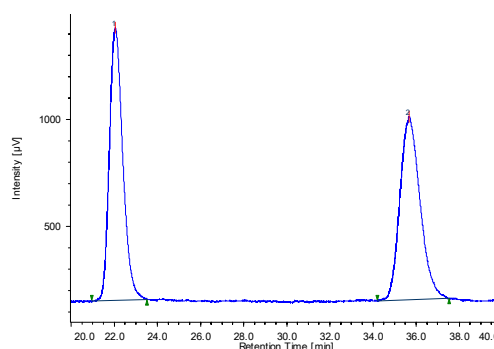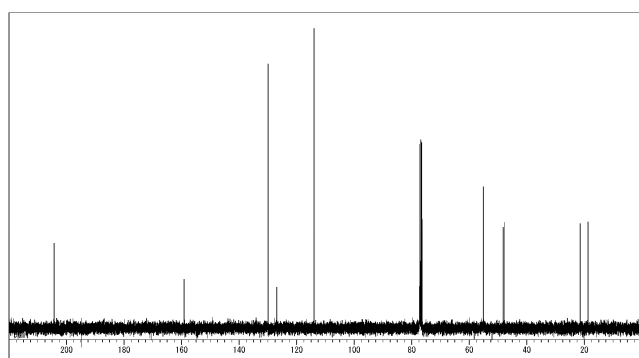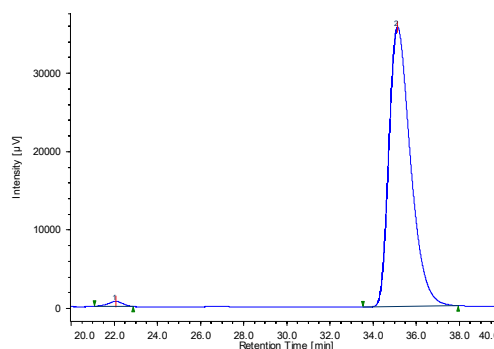

### (S)-3-(4-Bromophenyl)-2,2-dimethyl-4-nitrobutanal (3c)

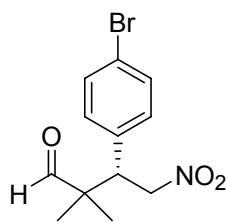

The enantioselectivity was determined by HPLC analysis [99% ee, DAICEL CHIRALCEL OD-H, 10% isopropanol/hexane, 1.0 mL/min, 254 nm;  $t_r$ (major enantiomer) = 38.2 min,  $t_r$ (minor enantiomer) = 24.0 min].

The absolute configuration was determined by comparison of the optical rotation with that of the literature.<sup>2</sup>  $[\alpha]^{26}_D = -3.3^\circ$  ( $c = 1.0$ ,  $\text{CHCl}_3$ ), white solid, Mp. 86-87 °C,  $\delta_H(\text{CDCl}_3)$  1.02 (3H, s), 1.13 (3H, s), 3.76 (1H, dd,  $J$  4.2, 11.3 Hz), 4.69 (1H, dd,  $J$  4.2, 13.2 Hz), 4.82 (1H, dd,  $J$  11.3, 13.2 Hz), 7.09 (2H, d,  $J$  8.6 Hz), 7.47 (2H, d,  $J$  8.6 Hz), 9.50 (1H, s);  $\delta_C(\text{CDCl}_3)$  18.8, 21.6, 47.8, 48.0, 75.9, 122.1, 130.6, 131.8, 134.3, 203.7;

$\nu(\text{KBr})/\text{cm}^{-1}$  3030, 2973, 2934, 2874, 2818, 2718, 1728, 1559, 1487, 1468, 1441, 1410, 1381, 1350, 1306, 1206, 1144, 1113, 1074, 1009, 889, 845, 781, 721, 702, 664; [HR EI-MS: Calc. for  $\text{C}_{12}\text{H}_{14}\text{BrNO}_3$  ( $M$ ): 299.0157. Found:  $M^+$ , 299.0145].

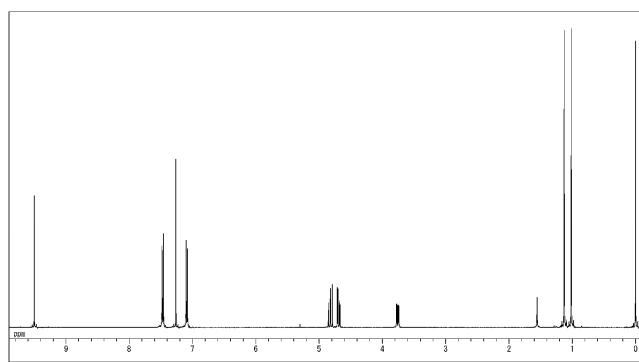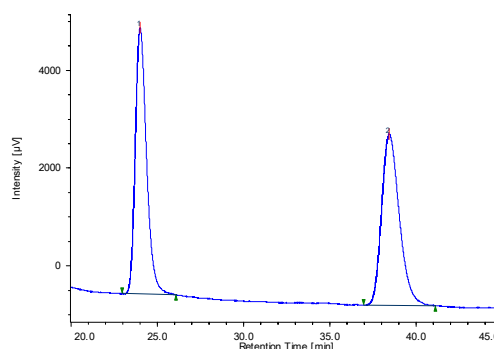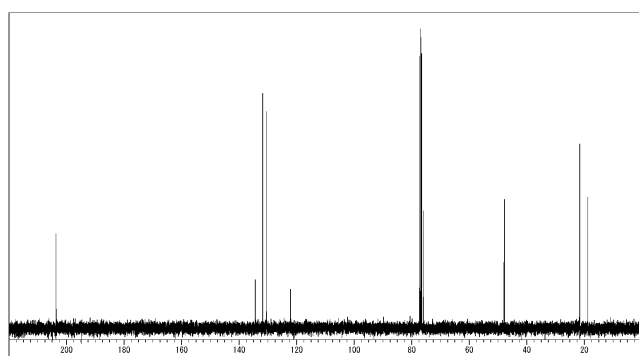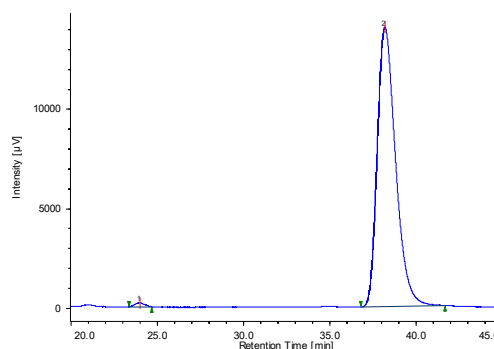

### 3-(3-Bromophenyl)-2,2-dimethyl-4-nitrobutanal (3d)<sup>3</sup>

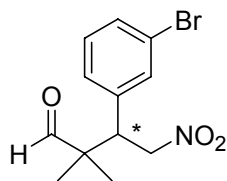

The enantioselectivity was determined by HPLC analysis [92% ee, DAICEL CHIRALCEL OD-H, 10% ethanol/hexane, 1.0 mL/min, 209 nm;  $t_r$ (major enantiomer) = 29.3 min,  $t_r$ (minor enantiomer) = 18.3 min].  $[\alpha]_D^{23} = +4.0^\circ$  ( $c = 1.0$ ,  $\text{CHCl}_3$ ), yellow oil,  $\delta_{\text{H}}(\text{CDCl}_3)$  1.02 (3H, s), 1.14 (3H, s), 3.77 (1H, dd,  $J$  4.0, 11.3 Hz), 4.69 (1H, dd,  $J$  4.0, 13.2 Hz), 4.83 (1H, dd,  $J$  11.3, 13.2 Hz), 7.14-7.24 (2H, m), 7.36 (1H, s), 7.43-7.46 (1H, m), 9.50 (1H, s);  $\delta_{\text{C}}(\text{CDCl}_3)$  18.8, 21.8, 47.9, 48.2, 76.0, 122.8, 127.7, 130.2, 131.3, 132.1, 137.9, 203.7;  $\nu(\text{neat})/\text{cm}^{-1}$  3073, 2975, 2936, 2877, 2812, 2710, 1727, 1558, 1475, 1434, 1380, 1348, 1295, 1213, 1141, 1067, 997, 978, 881, 840, 811, 783, 702, 646; [HR ESI-MS: Calc. for  $\text{C}_{12}\text{H}_{14}\text{BrNNaO}_3$  ( $M+\text{Na}$ ): 322.0055. Found:  $M+\text{Na}$ , 322.0044].

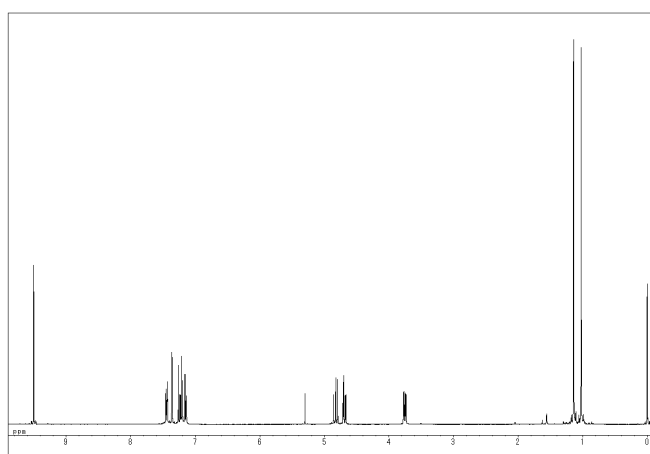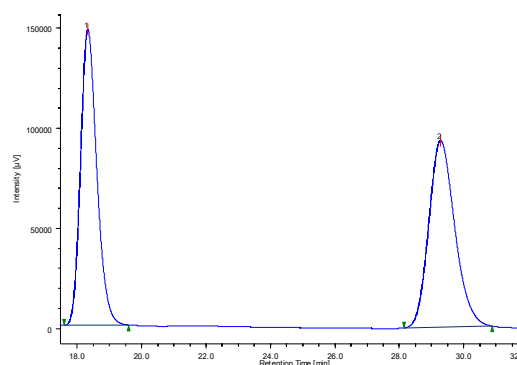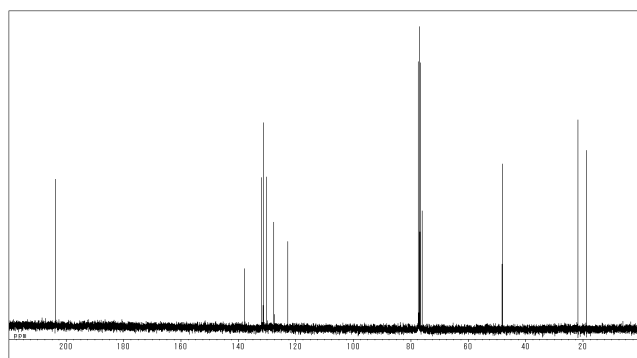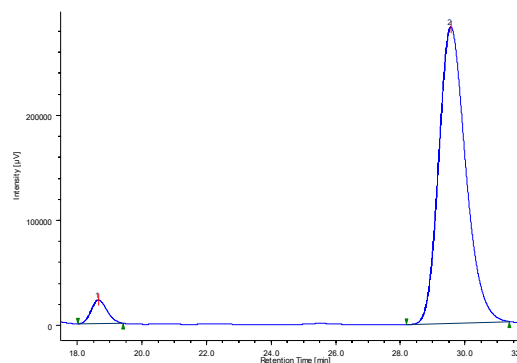

### 3-(2-Bromophenyl)-2,2-dimethyl-4-nitrobutanal (**3e**)<sup>3</sup>

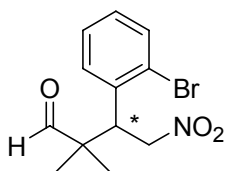

The enantioselectivity was determined by HPLC analysis [92% ee, DAICEL CHIRALCEL OD-H, 10% isopropanol/hexane, 1.0 mL/min, 209 nm;  $t_r$ (major enantiomer) = 47.0 min,  $t_r$ (minor enantiomer) = 16.4 min].

$[\alpha]_{D}^{23} = -13.0^\circ$  ( $c = 1.0$ ,  $\text{CHCl}_3$ ), orange solid, Mp. 60-61 °C,  $\delta_{\text{H}}(\text{CDCl}_3)$  1.10

(3H, s), 1.18 (3H, s), 4.63 (1H, dd,  $J$  4.1, 11.4 Hz), 4.72 (1H, dd,  $J$  4.1, 13.3 Hz), 4.84 (1H, dd,  $J$  11.4, 13.3 Hz), 7.14-7.18 (1H, m), 7.26-7.35 (2H, m), 7.61-7.63 (1H, m), 9.50 (1H, s);

$\delta_{\text{C}}(\text{CDCl}_3)$  18.7, 20.9, 45.2, 49.1, 76.4, 127.1, 127.8, 128.3, 129.4, 133.9, 135.4, 203.8;

$\nu(\text{KBr})/\text{cm}^{-1}$  3068, 3033, 2970, 2935, 2874, 2818, 2725, 1730, 1554, 1472, 1438, 1402, 1379, 1273, 1201, 1065, 1024, 910, 891, 801, 752, 723, 662, 625; [HR ESI-MS: Calc. for

$\text{C}_{12}\text{H}_{14}\text{BrNNaO}_3$  ( $M^+\text{Na}$ ): 322.0055. Found:  $M^+\text{Na}$ , 322.0052].

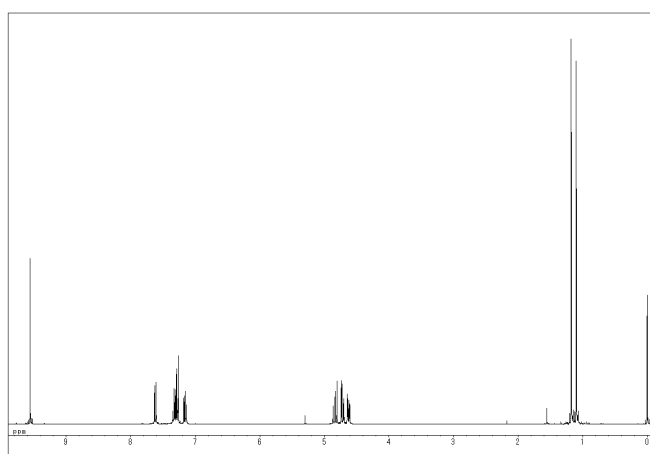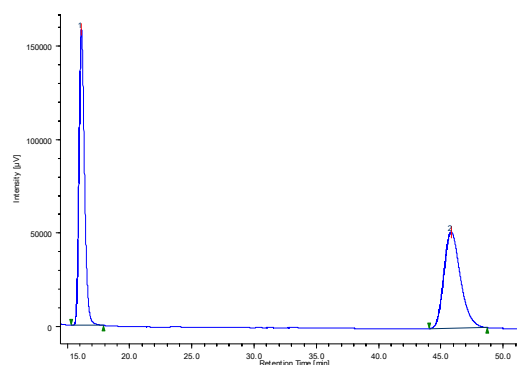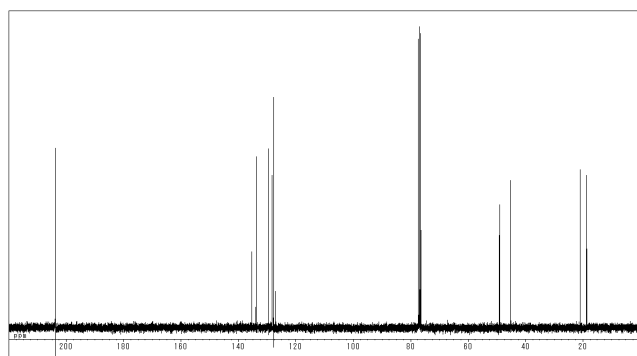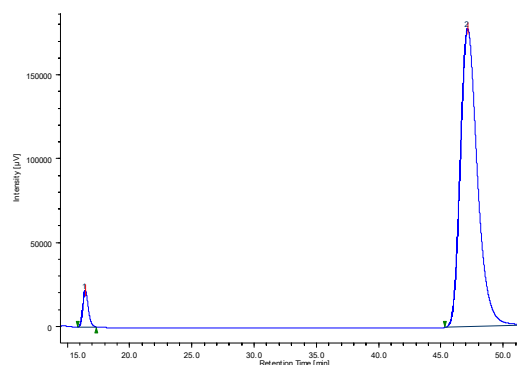

## 2,2-Dimethyl-3-(4-fluorophenyl)-4-nitrobutanal (3f)

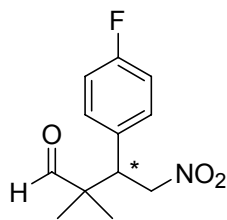

The enantioselectivity was determined by HPLC analysis [99% ee, DAICEL CHIRALCEL OD-H, 10% isopropanol/hexane, 1.0 mL/min, 254 nm;  $t_r$ (major enantiomer) = 33.9 min,  $t_r$ (minor enantiomer) = 17.4 min].

$[\alpha]^{26}_D = -1.5^\circ$  ( $c = 1.0$ ,  $\text{CHCl}_3$ ), light yellow oil,  $\delta_H(\text{CDCl}_3)$  1.01 (3H, s), 1.13 (3H, s), 3.78 (1H, dd,  $J$  4.2, 11.5 Hz), 4.69 (1H, dd,  $J$  4.2, 13.1 Hz), 4.82 (1H, dd,  $J$  11.5, 13.1 Hz), 7.01-7.06 (2H, m), 7.17-7.21 (2H, m), 9.51 (1H, s);  $\delta_C(\text{CDCl}_3)$  18.7, 21.5, 47.6, 48.1, 76.2, 115.6 (d,  $J$  21.5 Hz), 130.5 (d,  $J$  8.1 Hz), 131.0 (d,  $J$  3.3 Hz), 162.3 (d,  $J$  247.0 Hz), 203.9;  $\nu(\text{neat})/\text{cm}^{-1}$  3045, 2976, 2936, 2878, 2820, 2722, 1725, 1605, 1555, 1512, 1470, 1437, 1379, 1304, 1229, 1165, 1105, 1017, 883, 843, 750, 689, 646; [HR EI-MS: Calc. for  $\text{C}_{12}\text{H}_{14}\text{FNO}_3$  ( $M$ ): 239.0958. Found:  $M^+$ , 239.0954].

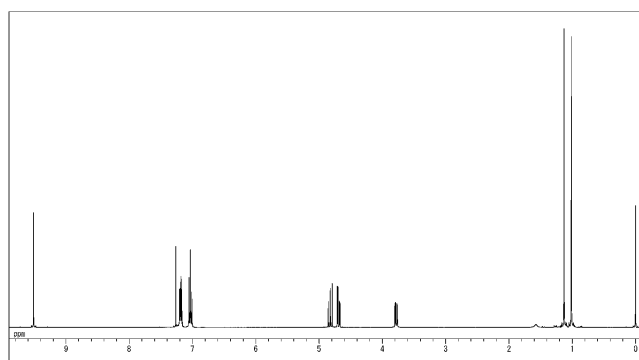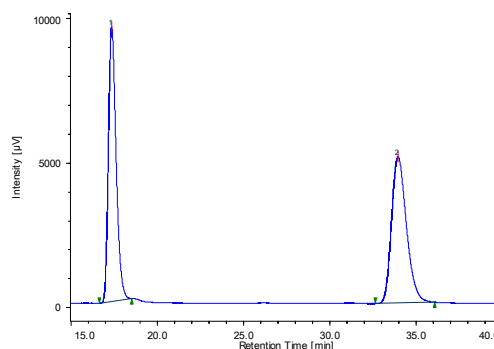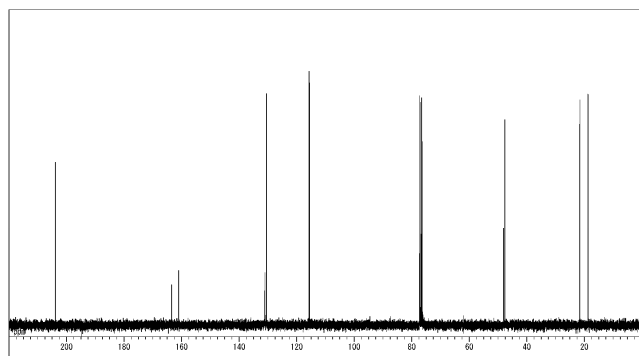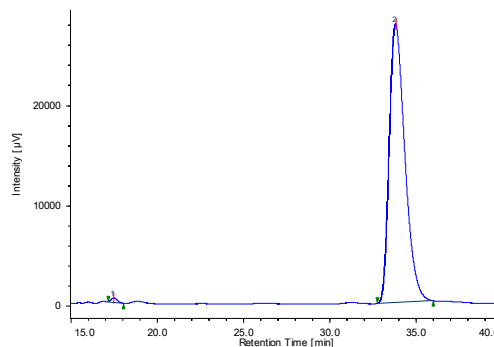



### Methyl 4-(3,3-dimethyl-1-nitro-4-oxobutan-2-yl)benzoate (3g)

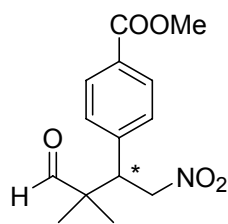

The enantioselectivity was determined by HPLC analysis [96% ee, DAICEL CHIRALPAK AD-H, 20% isopropanol/hexane, 1.0 mL/min, 209 nm;  $t_r$ (major enantiomer) = 13.5 min,  $t_r$ (minor enantiomer) = 11.5 min].  $[\alpha]_D^{23} = +7.9^\circ$  ( $c = 1.0$ ,  $\text{CHCl}_3$ ), white solid, Mp. 88-89 °C,  $\delta_{\text{H}}(\text{CDCl}_3)$  1.01 (3H, s), 1.14 (3H, s), 3.86 (1H, dd,  $J$  4.1, 11.4 Hz), 3.92 (3H, s), 4.73 (1H, dd,  $J$  4.1, 13.2 Hz), 4.89 (1H, dd,  $J$  11.4, 13.2 Hz), 7.30 (2H, d,  $J$  8.2 Hz), 8.01 (2H, d,  $J$  8.2 Hz), 9.52 (1H, s);  $\delta_{\text{C}}(\text{CDCl}_3)$  18.9, 21.8, 48.1, 48.2, 52.2, 75.9, 129.2, 129.9, 130.1, 140.7, 166.5, 203.6;  $\nu(\text{neat})/\text{cm}^{-1}$  3101, 3060, 3031, 2975, 2952, 2816, 2723, 1723, 1611, 1553, 1436, 1378, 1284, 1192, 1112, 1020, 962, 900, 862, 797, 762, 710, 630; [HR ESI-MS: Calc. for  $\text{C}_{14}\text{H}_{17}\text{NNaO}_5$  ( $M+\text{Na}$ ): 302.1004. Found:  $M+\text{Na}$ , 302.1007].

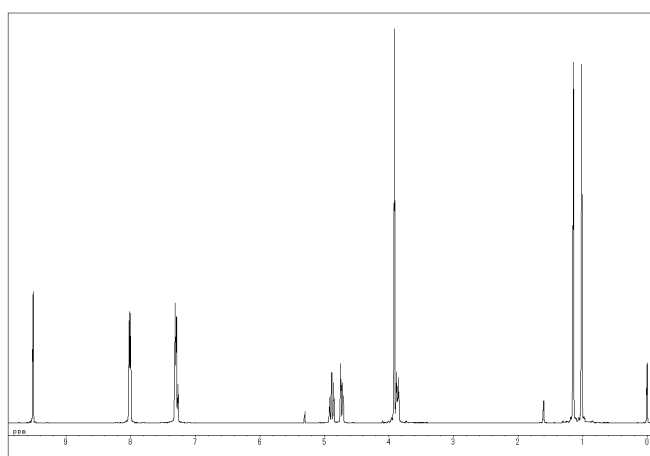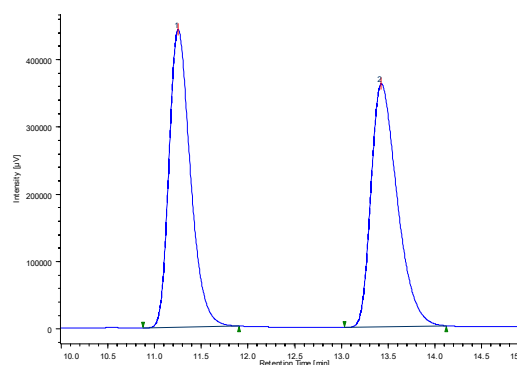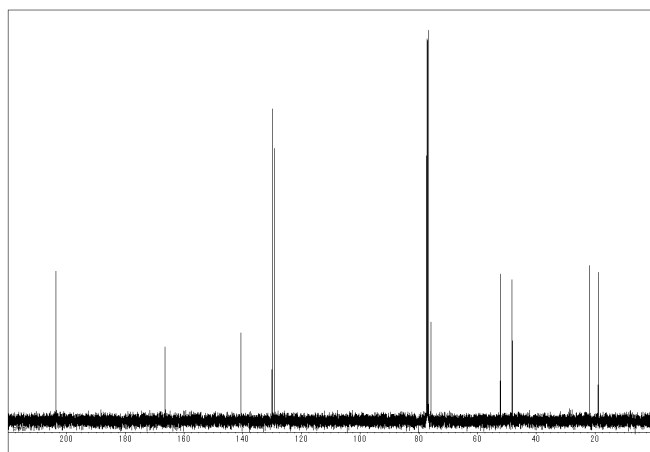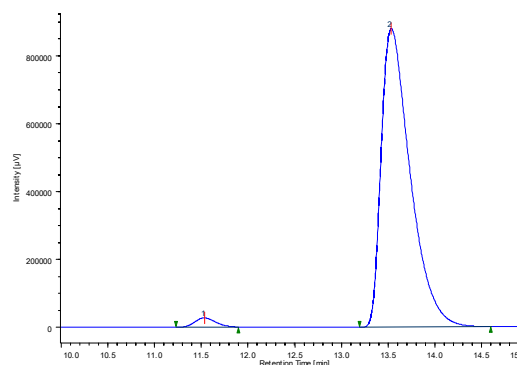

### (S)-2,2-Dimethyl-4-nitro-3-(4-nitrophenyl)butanal (3h)

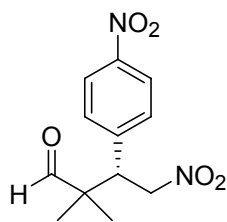

The enantioselectivity was determined by HPLC analysis [97% ee, DAICEL CHIRALPAK AD-H, 20% isopropanol/hexane, 1.0 mL/min, 209 nm;  $t_r$ (major enantiomer) = 20.6 min,  $t_r$ (minor enantiomer) = 15.5 min].

The absolute configuration was determined by comparison of the optical rotation with that of the literature.<sup>1f,g</sup>  $[\alpha]^{23}_D = -7.6^\circ$  (c = 1.0, CHCl<sub>3</sub>),

orange solid, Mp. 57-59 °C,  $\delta_H$ (CDCl<sub>3</sub>) 1.06 (3H, s), 1.16 (3H, s), 3.93 (1H, dd,  $J$ 4.1, 11.4 Hz), 4.78 (1H, dd,  $J$ 4.1, 13.7 Hz), 4.92 (1H, dd,  $J$ 11.4, 13.7 Hz), 7.43 (2H, d,  $J$ 8.7 Hz), 8.22 (2H, d,  $J$ 8.7 Hz), 9.49 (1H, s);  $\delta_C$ (CDCl<sub>3</sub>) 19.1, 21.9, 48.1, 48.2, 75.8, 123.8, 130.1, 143.3, 147.7, 203.1;  $\nu$ (KBr)/cm<sup>-1</sup> 3112, 3083, 2974, 2939, 2876, 2825, 2719, 1729, 1606, 1561, 1469, 1440, 1348, 1205, 1187, 1110, 1012, 887, 859, 747, 704, 656.

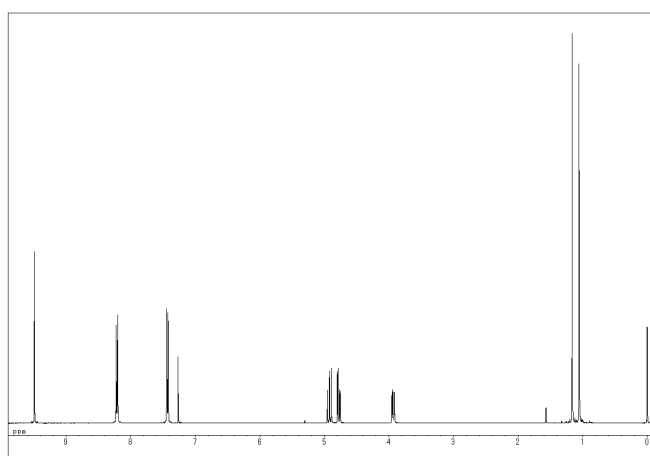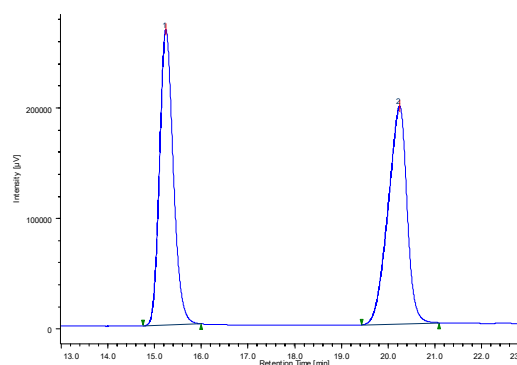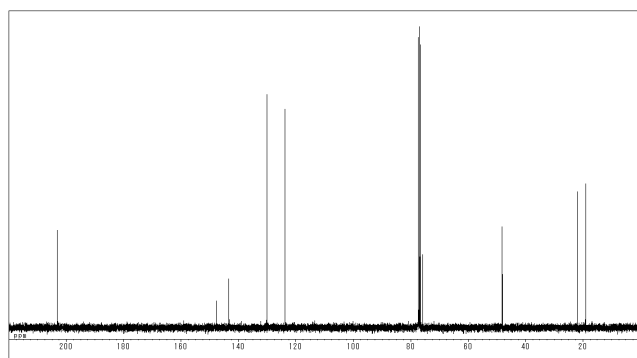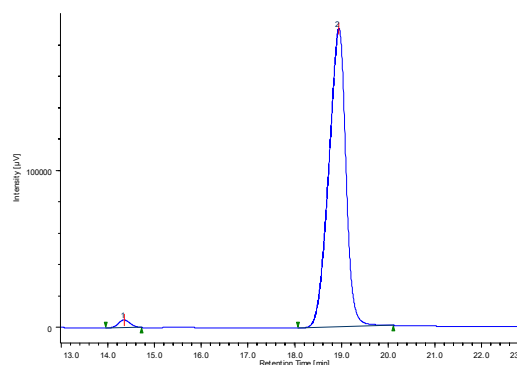

### (S)-2,2-Dimethyl-3-(furan-2-yl)-4-nitrobutanal (3i)

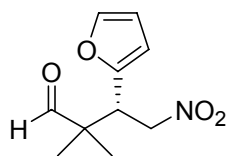

The enantioselectivity was determined by HPLC analysis [96% ee, DAICEL CHIRALPAK AD-H, 1% isopropanol/hexane, 1.0 mL/min, 254 nm;  $t_r$ (major enantiomer) = 21.9 min,  $t_r$ (minor enantiomer) = 17.0 min].

The absolute configuration was determined by comparison of the optical rotation with that of the literature.<sup>1f,g,2a</sup>

$[\alpha]^{26}_D = +20.2^\circ$  ( $c = 1.0$ ,  $\text{CHCl}_3$ ), light yellow oil,  $\delta_H(\text{CDCl}_3)$  1.05 (3H, s), 1.18 (3H, s), 3.92 (1H, dd,  $J$  3.9, 11.0 Hz), 4.59 (1H, dd,  $J$  3.9, 12.8 Hz), 4.76 (1H, dd,  $J$  11.0, 12.8 Hz), 6.22 (1H, d,  $J$  3.2 Hz), 6.31 (1H, dd,  $J$  1.6, 3.2 Hz), 7.38 (1H, d,  $J$  1.6 Hz), 9.51 (1H, s);  $\delta_C(\text{CDCl}_3)$  19.0, 21.1, 42.2, 48.1, 74.8, 109.6, 110.4, 142.7, 149.7, 203.4;  $\nu(\text{neat})/\text{cm}^{-1}$  3151, 3123, 2975, 2935, 2877, 2821, 2720, 1772, 1727, 1556, 1505, 1469, 1433, 1377, 1344, 1294, 1181, 1148, 1078, 1016, 973, 915, 886, 819, 742, 700, 599; [HR EI-MS: Calc. for  $\text{C}_{10}\text{H}_{13}\text{NO}_4$  ( $M$ ): 211.0845. Found:  $M^+$ , 211.0853].

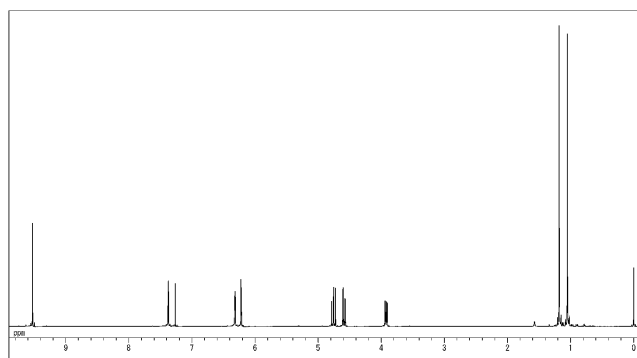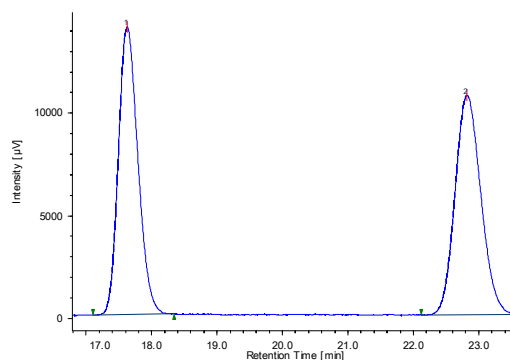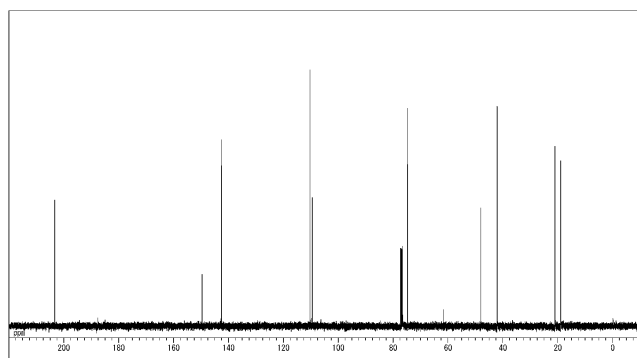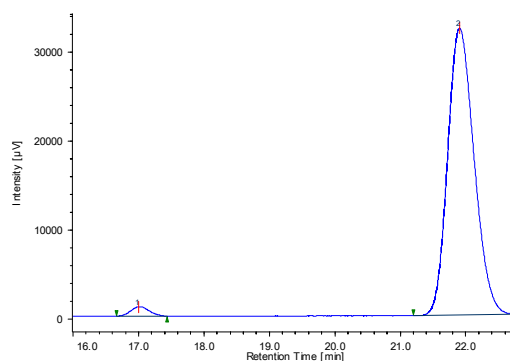

### (S)-2,2-Dimethyl-4-nitro-3-(thiophen-2-yl)butanal (3j)

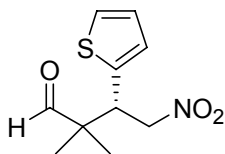

The enantioselectivity was determined by HPLC analysis [95% ee, DAICEL CHIRALPAK AD-H, 10% isopropanol/hexane, 0.5 mL/min, 209 nm;  $t_r$ (major enantiomer) = 19.5 min,  $t_r$ (minor enantiomer) = 18.3 min].

The absolute configuration was determined by comparison of the optical rotation with that of the literature.<sup>1f,g</sup>  $[\alpha]^{23}_D = -5.1^\circ$  ( $c = 1.0$ ,  $\text{CHCl}_3$ ), light yellow oil,  $\delta_H(\text{CDCl}_3)$  1.09 (3H, s), 1.21 (3H, s), 4.14 (1H, dd,  $J$  4.3, 10.6 Hz), 4.66 (1H, dd,  $J$  4.3, 12.8 Hz), 4.73 (1H, dd,  $J$  10.6, 12.8 Hz), 6.93 (1H, d,  $J$  3.6 Hz), 6.97 (1H, dd,  $J$  3.6, 5.0 Hz), 7.25 (1H, d,  $J$  5.0 Hz), 9.54 (1H, s);  $\delta_C(\text{CDCl}_3)$  18.9, 21.5, 44.0, 48.3, 77.8, 125.5, 126.9, 127.9, 137.8, 203.6;  $\nu(\text{neat})/\text{cm}^{-1}$  3110, 2974, 2930, 2880, 2819, 2719, 1724, 1556, 1468, 1434, 1379, 1341, 1249, 1206, 1162, 1064, 883, 851, 706.

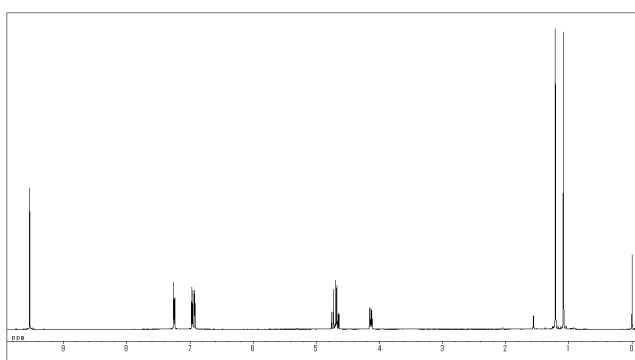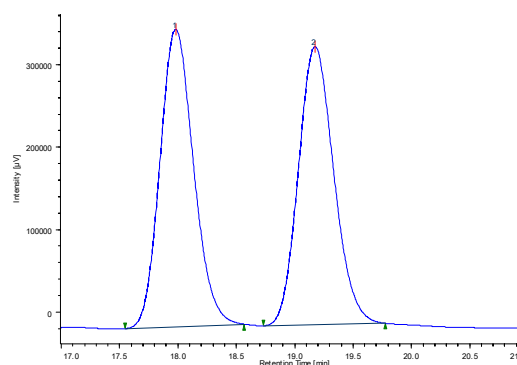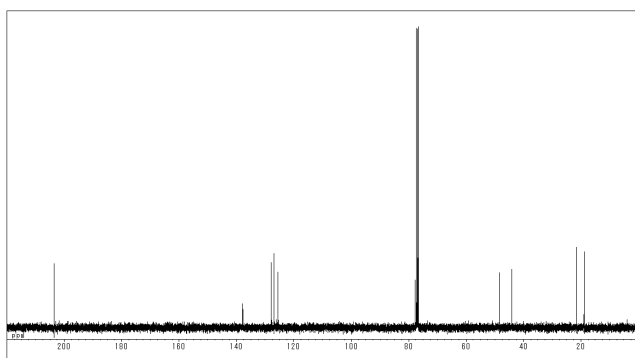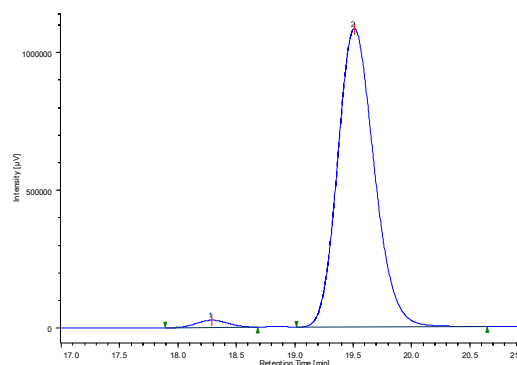

## 2,2-Dimethyl-4-nitro-3-(3-pyridyl)butanal (3k)

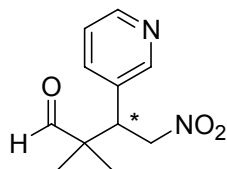

The enantioselectivity was determined by HPLC analysis [93% ee, DAICEL CHIRALPAK AD-H, 20% isopropanol/hexane, 1.0 mL/min, 209 nm;  $t_r$ (major enantiomer) = 11.1 min,  $t_r$ (minor enantiomer) = 13.0 min].

$[\alpha]_D^{23} = +9.9^\circ$  ( $c = 1.0$ ,  $\text{CHCl}_3$ ), orange oil,  $\delta_{\text{H}}(\text{CDCl}_3)$  1.05 (3H, s), 1.15 (3H, s), 3.82 (1H, dd,  $J$  4.1, 11.4 Hz), 4.75 (1H, dd,  $J$  4.1, 13.7 Hz), 4.88 (1H, dd,  $J$  11.4, 13.7 Hz), 7.27-7.31 (1H, m), 7.57-7.60 (1H, m), 8.51-8.52 (1H, m), 8.56-8.58 (1H, m), 9.51 (1H, s);  $\delta_{\text{C}}(\text{CDCl}_3)$  18.9, 21.8, 46.0, 48.2, 75.7, 123.5, 131.4, 136.1, 149.6, 150.6, 203.4;  $\nu(\text{neat})/\text{cm}^{-1}$  3420, 2975, 2934, 2872, 2822, 2722, 1725, 1555, 1469, 1430, 1379, 1186, 1027, 883, 822, 718; [HR ESI-MS: Calc. for  $\text{C}_{11}\text{H}_{15}\text{N}_2\text{O}_3$  ( $M+H$ ): 223.1083. Found:  $M+H$ , 223.1081].

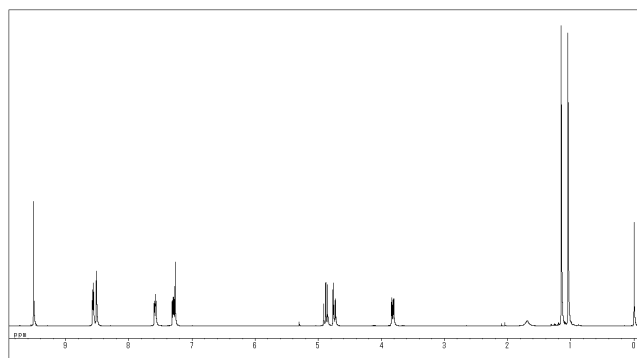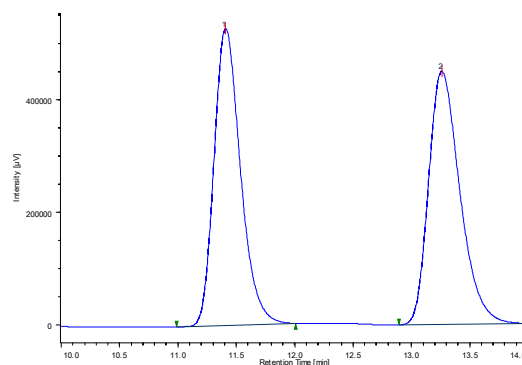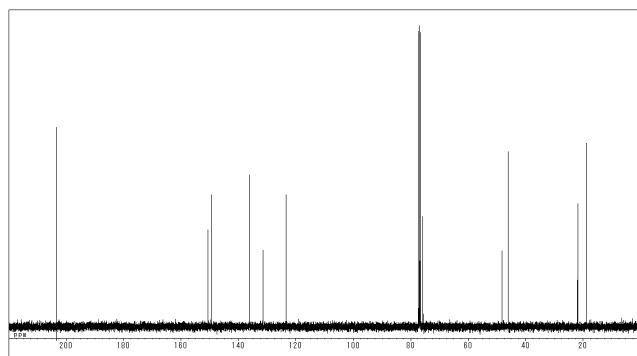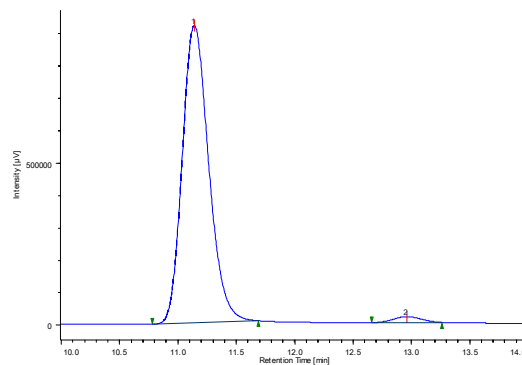

**(S)-(E)-2,2-Dimethyl-3-(nitromethyl)-5-phenylpent-4-enal (3l)**

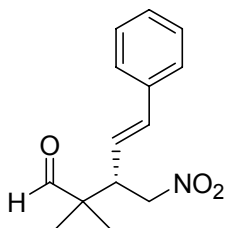

The enantioselectivity was determined by HPLC analysis [96% ee, DAICEL CHIRALPAK AD-H, 5% ethanol/hexane, 1.0 mL/min, 209 nm;  $t_r$ (major enantiomer) = 32.8 min,  $t_r$ (minor enantiomer) = 25.9 min]. The absolute configuration was determined by comparison of the optical rotation with that of the literature.<sup>1f,g</sup>  $[\alpha]^{28}_D = +22.6^\circ$  ( $c = 1.0$ ,  $\text{CHCl}_3$ ),

yellow oil,  $\delta_H(\text{CDCl}_3)$  1.167 (3H, s), 1.172 (3H, s), 3.27 (1H, ddd,  $J$  4.1, 9.9, 10.4 Hz), 4.46 (1H, dd,  $J$  10.4, 12.2 Hz), 4.52 (1H, dd,  $J$  4.1, 12.2 Hz), 6.02 (1H, dd,  $J$  9.9, 15.9 Hz), 6.53 (1H, d,  $J$  15.9 Hz), 7.27-7.35 (5H, m), 9.51 (1H, s);  $\delta_C(\text{CDCl}_3)$  19.0, 20.9, 47.2, 47.7, 76.6, 122.8, 126.5, 128.2, 128.6, 135.9, 136.3, 203.7;  $\nu(\text{neat})/\text{cm}^{-1}$  3060, 3028, 2974, 2932, 2875, 2817, 2716, 1723, 1554, 1494, 1468, 1449, 1434, 1380, 1200, 1075, 972, 887, 749, 694.

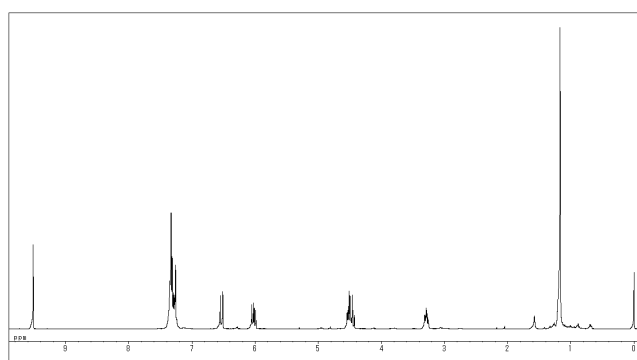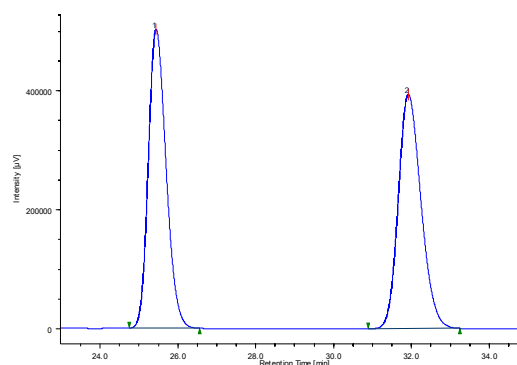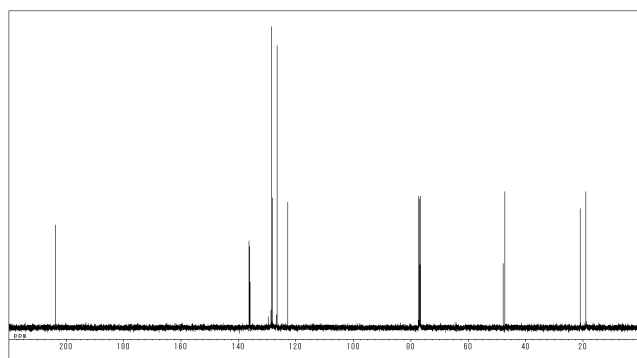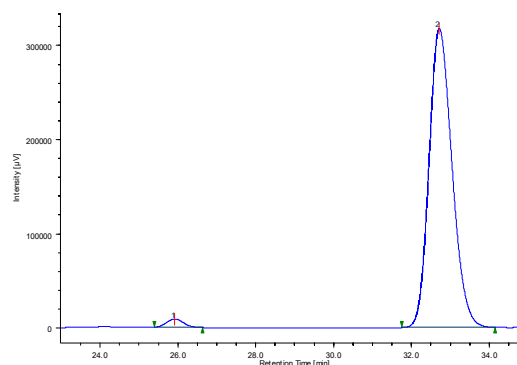

**(E)-2,2-Dimethyl-3-(nitromethyl)oct-4-enal (3m)**

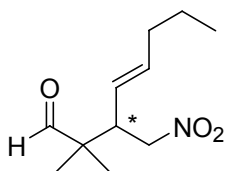

The enantioselectivity was determined by HPLC analysis [94% ee, DAICEL CHIRALCEL OD-H, 20% isopropanol/hexane, 1.0 mL/min, 209 nm;  $t_r$ (major enantiomer) = 10.0 min,  $t_r$ (minor enantiomer) = 6.1 min].

$[\alpha]_{28}^{28} = -20.3^\circ$  ( $c = 1.0$ ,  $\text{CHCl}_3$ ), colorless oil,  $\delta_{\text{H}}(\text{CDCl}_3)$  0.86 (3H, t,  $J$  7.3 Hz), 1.09 (6H, s), 1.31-1.41 (2H, m), 1.98 (2H, dt,  $J$  6.8, 7.3 Hz), 3.05 (1H, ddd,  $J$  3.9, 9.8, 10.7 Hz), 4.30 (1H, dd,  $J$  10.7, 11.7 Hz), 4.42 (1H, dd,  $J$  3.9, 11.7 Hz), 5.26 (1H, dd,  $J$  9.8, 15.1 Hz), 5.59 (1H, dt,  $J$  6.8, 15.1 Hz), 9.47 (1H, s);  $\delta_{\text{C}}(\text{CDCl}_3)$  13.4, 18.8, 20.5, 22.1, 34.5, 46.9, 47.3, 76.9, 123.2, 138.1, 204.0;  $\nu(\text{neat})/\text{cm}^{-1}$  2963, 2931, 2873, 2714, 1728, 1556, 1466, 1436, 1380, 1339, 1202, 1056, 934, 887, 780, 718, 634.

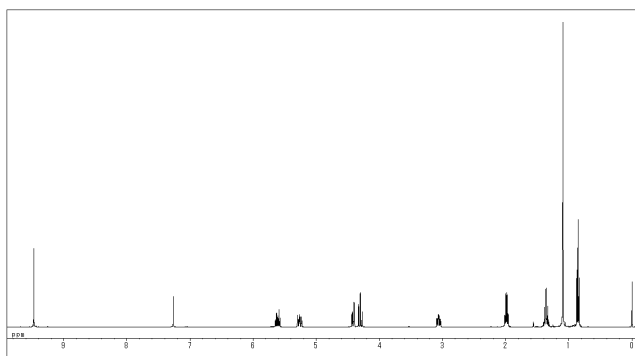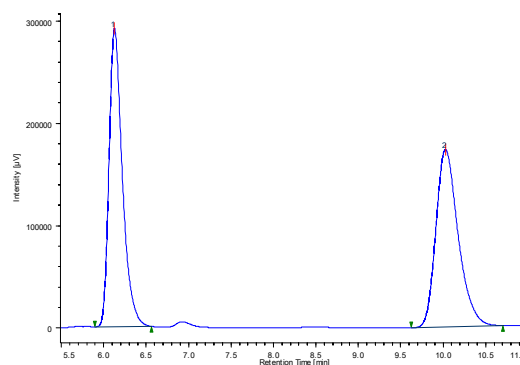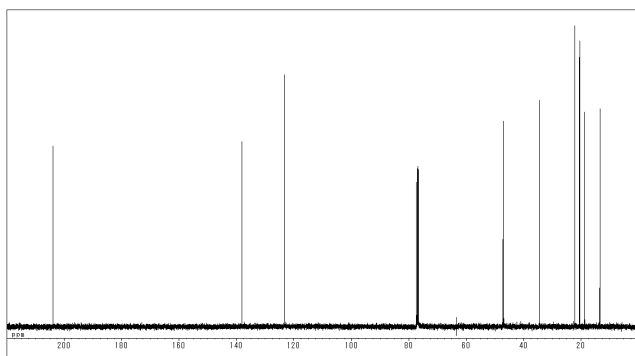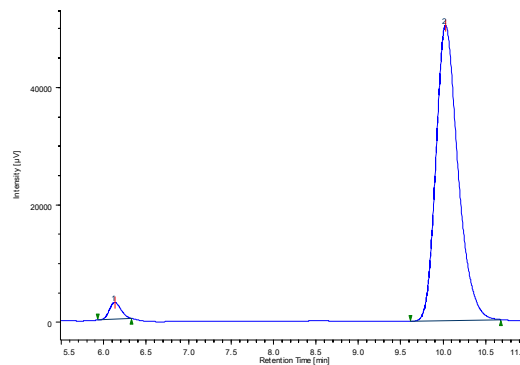

### 3-Cyclohexyl-2,2-dimethyl-4-nitrobutanal (3n)

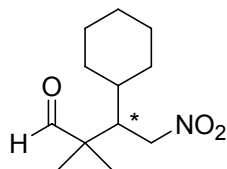

The enantioselectivity was determined by HPLC analysis [88% ee, DAICEL CHIRALCEL OD-H, 5% isopropanol/hexane, 1.0 mL/min, 210 nm;  $t_r$ (major enantiomer) = 9.3 min,  $t_r$ (minor enantiomer) = 7.6 min].

$[\alpha]_D^{26} = -11.3^\circ$  ( $c = 1.0$ ,  $\text{CHCl}_3$ ), colorless oil,  $\delta_{\text{H}}(\text{CDCl}_3)$  0.90-1.29 (1H, m), 1.47-1.76 (6H, m), 2.57-2.61 (1H, m), 4.40 (1H, dd,  $J$  5.0, 14.0 Hz), 4.48 (1H, dd,  $J$  6.5, 14.0 Hz), 9.51 (1H, s);  $\delta_{\text{C}}(\text{CDCl}_3)$  19.2, 20.5, 25.4, 25.9, 26.3, 29.0, 32.9, 38.2, 46.8, 48.7, 73.5, 203.9;  $\nu(\text{neat})/\text{cm}^{-1}$  2929, 2855, 2709, 1724, 1554, 1449, 1373, 1308, 1249, 1103, 1025, 893, 841, 760, 704.

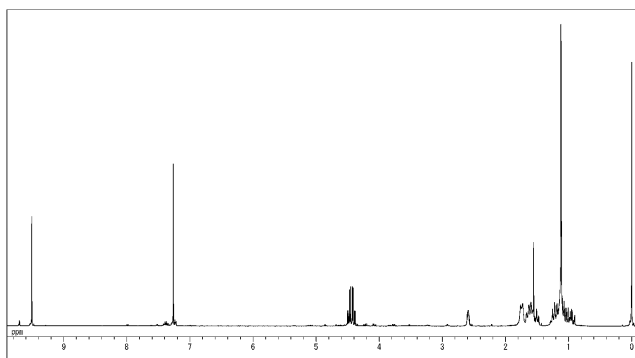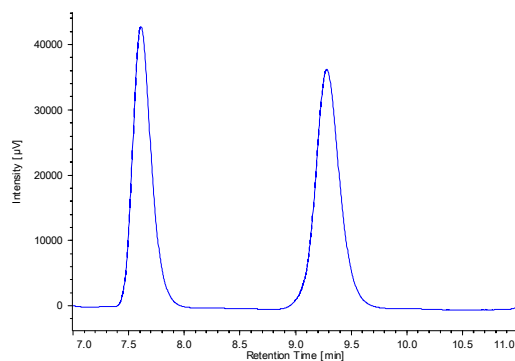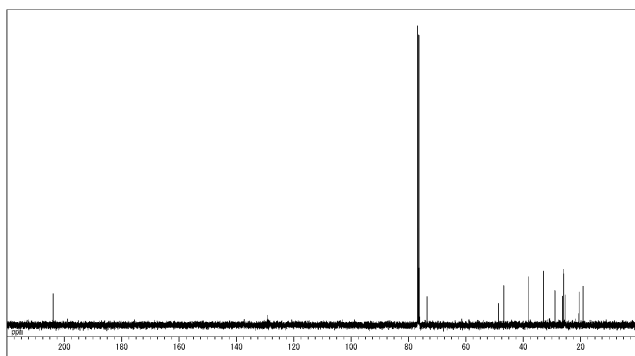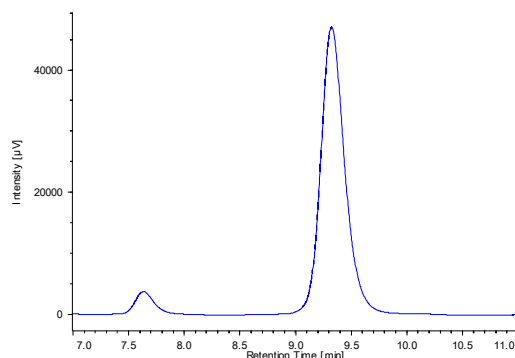



### (S)-2,2-Dimethyl-3-(nitromethyl)-5-phenylpentanal (3o)

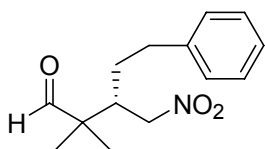

The enantioselectivity was determined by HPLC analysis [88% ee, DAICEL CHIRALPAK AD-H, 1% isopropanol/hexane, 1.0 mL/min, 254 nm;  $t_r$ (major enantiomer) = 16.1 min,  $t_r$ (minor enantiomer) = 17.4 min].

The absolute configuration was determined by comparison of the optical rotation with that of the literature.<sup>3</sup>  $[\alpha]^{26}_D = -22.5^\circ$  ( $c = 1.0$ ,  $\text{CHCl}_3$ ), colorless oil,  $\delta_H(\text{CDCl}_3)$  1.07 (6H, s), 1.57-1.77 (2H, m), 2.54-2.65 (2H, m), 2.68-2.76 (1H, m), 4.35 (1H, dd,  $J$  6.5, 13.1 Hz), 4.49 (1H, dd,  $J$  5.1, 13.1 Hz), 7.14-7.31 (5H, m), 9.37 (1H, s);  $\delta_C(\text{CDCl}_3)$  18.0, 19.3, 31.1, 33.6, 40.6, 48.3, 76.2, 125.9, 127.9, 128.1, 140.2, 203.4;  $\nu(\text{neat})/\text{cm}^{-1}$  3062, 3028, 2971, 2949, 2871, 2817, 2711, 1725, 1603, 1555, 1496, 1455, 1381, 1211, 1091, 1030, 885, 751, 701; [HR ESI-MS: Calc. for  $\text{C}_{14}\text{H}_{20}\text{NO}_3$  ( $M+H$ ): 250.1443. Found:  $M+H$ , 250.1424].

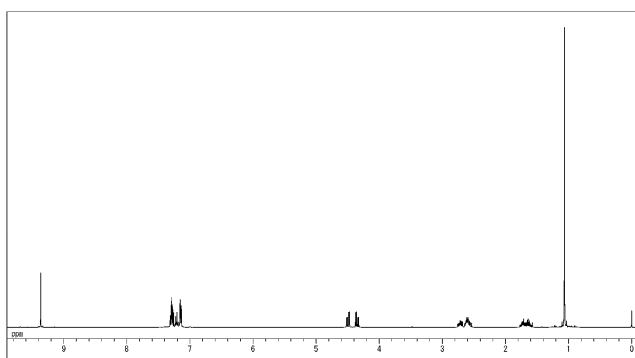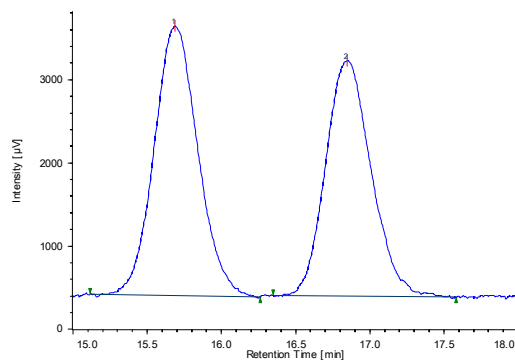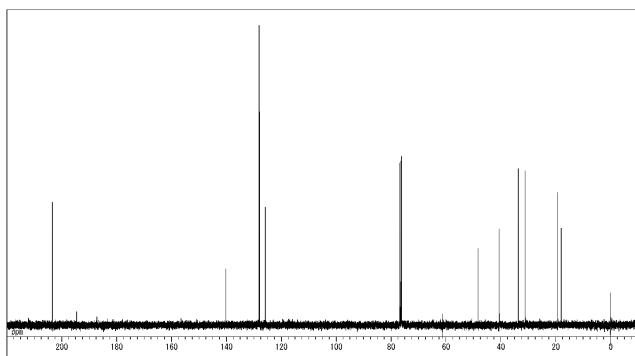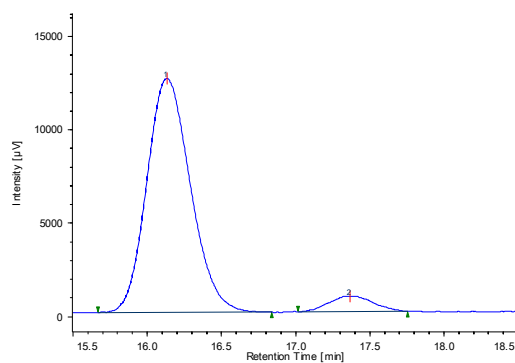

### 2,2,3-Trimethyl-4-nitrobutanal (3p)

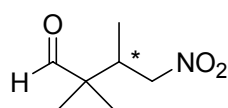

The enantioselectivity was determined by HPLC analysis [91% ee, DAICEL CHIRALCEL OD-H, 20% isopropanol/hexane, 1.0 mL/min, 209 nm;  $t_r$ (major enantiomer) = 10.5 min,  $t_r$ (minor enantiomer) = 8.4 min].

$[\alpha]_{26}^D = -20.0^\circ$  ( $c = 1.0$ ,  $\text{CHCl}_3$ ), colorless oil,  $\delta_{\text{H}}(\text{CDCl}_3)$  1.03 (3H, d,  $J$  6.8 Hz), 1.09 (3H, s), 1.10 (3H, s), 2.65-2.71 (1H, m), 4.17 (1H, dd,  $J$  10.2, 12.2 Hz), 4.44 (1H, dd,  $J$  3.9, 12.2 Hz), 9.47 (1H, s);  $\delta_{\text{C}}(\text{CDCl}_3)$  12.9, 18.7, 19.1, 36.5, 47.6, 78.3, 203.9;  $\nu(\text{neat})/\text{cm}^{-1}$  2977, 2942, 2883, 2820, 2716, 1725, 1556, 1469, 1436, 1380, 1241, 1128, 1050, 885, 847, 778, 717.

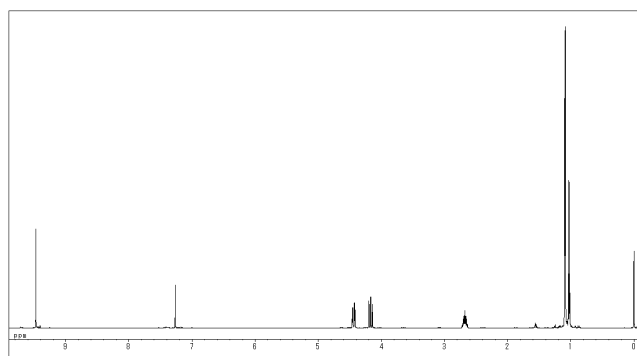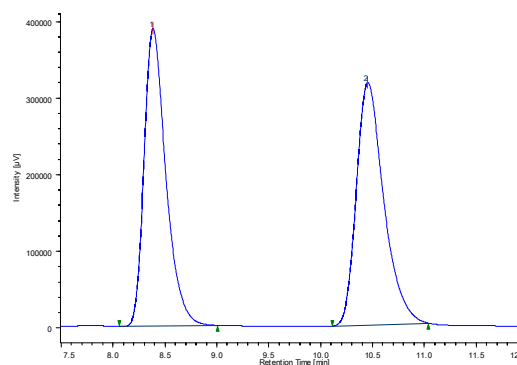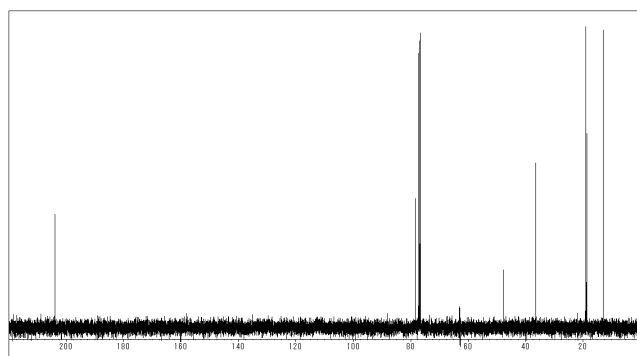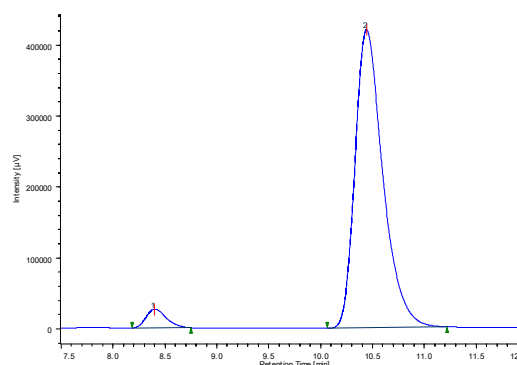

## 2-Methyl-4-nitro-2,3-diphenylbutanal (**3q**)<sup>2a</sup>

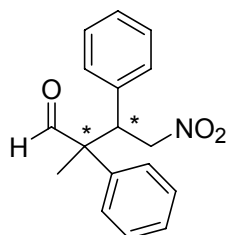

The enantioselectivity was determined by HPLC analysis [10% ee, DAICEL CHIRALCEL OD-H, 2% isopropanol/hexanes, 1.2 mL/min, 209 nm;  $t_r$ (major enantiomer, anti) = 30.0 min,  $t_r$ (minor enantiomer, syn) = 33.6 min,  $t_r$ (minor enantiomer, anti) = 43.1 min,  $t_r$ (major enantiomer, syn) = 47.4 min]. white solid, Mp. 98-100 °C, Characterization data for syn

isomer:  $\delta_H$ (CDCl<sub>3</sub>): 1.52 (3H, s), 4.20 (1H, dd,  $J$ 3.9, 11.2 Hz), 4.86 (1H, dd,  $J$ 3.9, 13.1 Hz), 5.03 (1H, dd,  $J$ 11.2, 13.1 Hz), 6.92-6.94 (2H, m), 7.05-7.07 (2H, m), 7.10-7.14 (3H, m), 7.25-7.33 (3H, m), 9.56 (1H, s);  $\delta_C$ (CDCl<sub>3</sub>) 16.7, 49.6, 56.6, 76.1, 127.2, 127.6, 128.0, 128.1, 129.0, 129.2, 135.3, 137.2, 201.0;  $\nu$ (KBr)/cm<sup>-1</sup> 3086, 3065, 3028, 3000, 2980, 2921, 2827, 2724, 1962, 1886, 1811, 1718, 1600, 1557, 1494, 1455, 1430, 1379, 1205, 1097, 1078, 1029, 1003, 992, 919, 903, 865, 783, 747, 700.

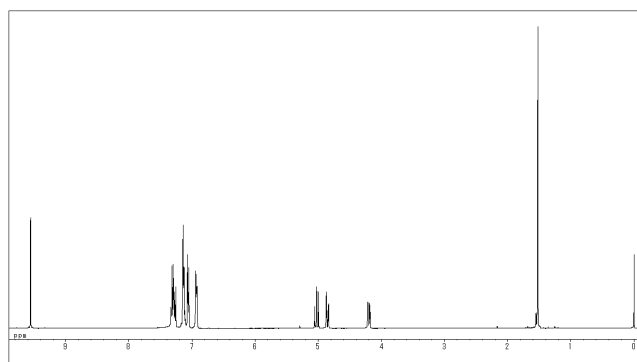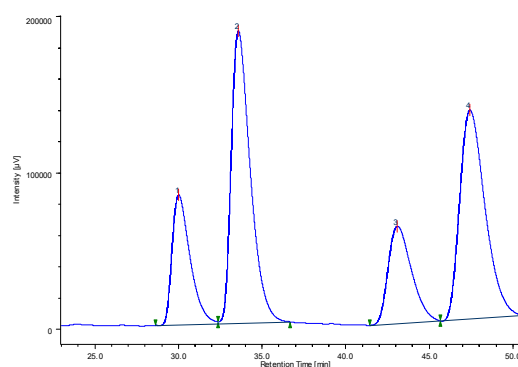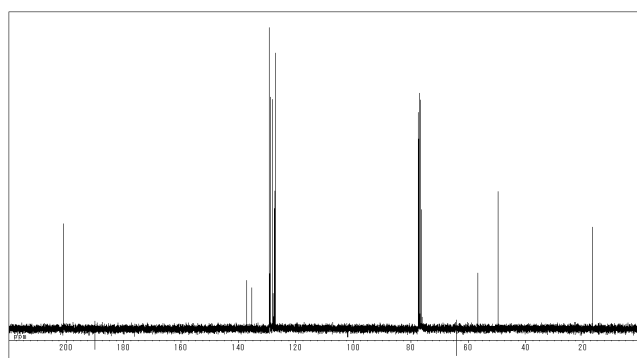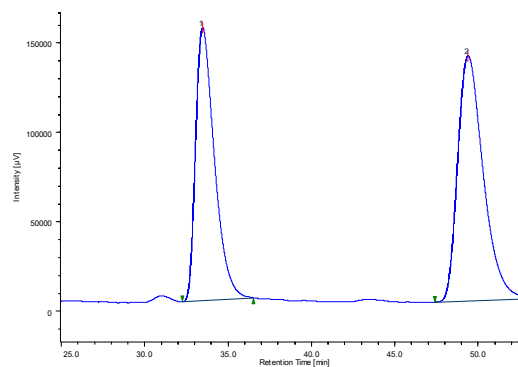

## 2-Methyl-2-(2-nitro-1-phenylethyl)pentanal (**3r**)<sup>1c,d</sup>

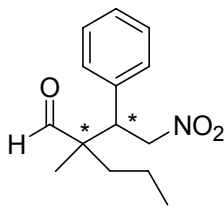

The enantioselectivity was determined by HPLC analysis [22% ee, DAICEL CHIRALCEL OD-H, 4% isopropanol/hexanes, 1.0 mL/min, 254 nm;  $t_r$ (minor enantiomer, anti) = 21.9 min,  $t_r$ (minor enantiomer, syn) = 28.7 min,  $t_r$ (major enantiomer, syn) = 39.0 min,  $t_r$ (major enantiomer, anti) = 44.0 min]. light yellow oil,  $\delta_H$ (CDCl<sub>3</sub>): 0.84 (syn) and 0.90 (anti) (3H, t,  $J$

6.8 Hz), 1.10 (anti) and 1.11 (syn) (3H, s), 1.15-1.66 (syn and anti) (4H, m), 3.77 (anti) and 3.79 (syn) (1H, dd,  $J$  4.4, 11.2 and 3.9, 11.7 Hz), 4.62 (syn) and 4.76 (anti) (1H, dd,  $J$  3.9, 13.2 and 4.4, 12.7 Hz), 4.84 (syn) and 4.85 (anti) (1H, dd,  $J$  11.7, 13.2 and 11.2, 12.7 Hz), 7.16-7.21 (syn and anti) (2H, m), 7.28-7.35 (syn and anti) (3H, m), 9.52 (anti) and 9.54 (syn) (1H, s);  $\delta_C$ (CDCl<sub>3</sub>) 14.4 (syn), 14.6 (anti), 15.7 (syn), 17.0 (syn), 17.1 (anti), 17.3 (anti), 36.5 (anti), 37.5 (syn), 47.5 (syn), 49.1 (anti), 51.0 (anti), 51.6 (syn), 76.2 (anti), 76.7 (syn), 128.10 (syn), 128.13 (anti), 128.7 (syn and anti), 129.0 (anti), 129.1 (syn), 205.0 (anti), 205.4 (syn);  $\nu$ (neat)/cm<sup>-1</sup> 3064, 3032, 2962, 2935, 2874, 2720, 1730, 1603, 1555, 1497, 1455, 1379, 1205, 1092, 1033, 1005, 982, 913, 851, 798, 751, 704.

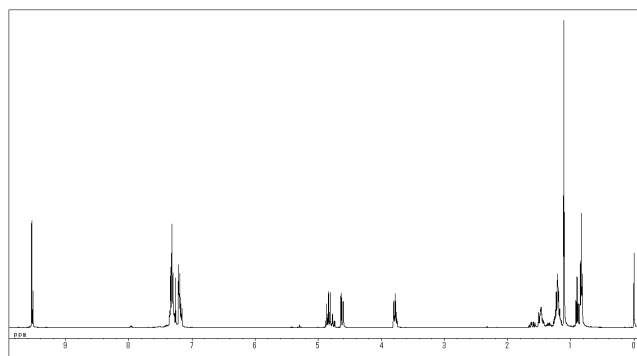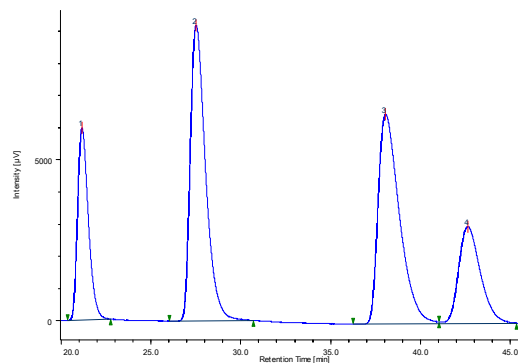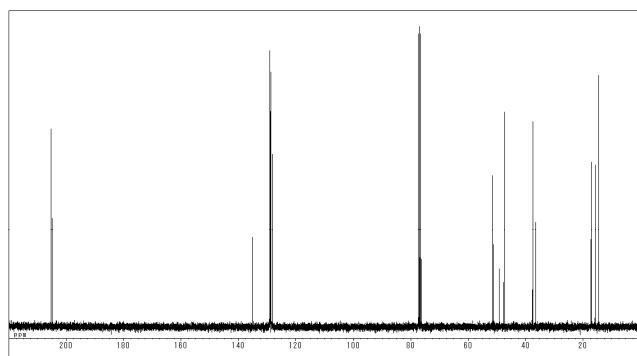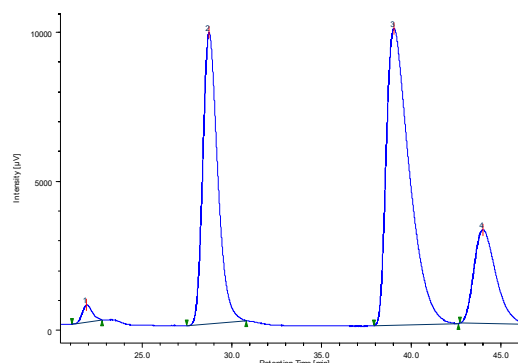

## 2-(2-nitro-1-phenylethyl)pentanal (3s)<sup>4</sup>

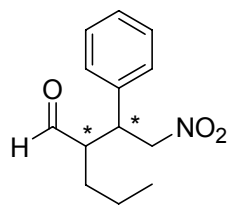

The enantioselectivity was determined by HPLC analysis [78% ee, DAICEL CHIRALCEL OD-H, 15% isopropanol/hexanes, 1.0 mL/min, 254 nm;  $t_r$ (major enantiomer, syn) = 18.1 min,  $t_r$ (major enantiomer, anti) = 23.2 min,  $t_r$ (minor enantiomer, syn) = 26.9 min,  $t_r$ (minor enantiomer, anti) = 43.0 min]. colorless oil,  $\delta_H$ (CDCl<sub>3</sub>): 0.80 (syn) and 0.93 (anti) (3H, t,

$J$ 6.2 Hz), 1.11-1.74 (syn and anti) (4H, m), 2.60-2.66 (anti) and 2.67-2.74 (syn) (1H, m), 3.75-3.83 (syn and anti) (1H, m), 4.65 (syn) and 4.75 (anti) (1H, dd,  $J$ 9.6, 12.7 and 9.1, 13.0 Hz), 4.71 (syn) and 4.82 (anti) (1H, dd,  $J$ 4.5, 12.7 and 6.2, 13.0 Hz), 7.16-7.19 (syn and anti) (2H, m), 7.26-7.37 (syn and anti) (3H, m), 9.48 (anti) and 9.71 (syn) (1H, d,  $J$ 3.1 and 3.0 Hz);  $\delta_C$ (CDCl<sub>3</sub>) 13.90 (syn), 13.95 (anti), 19.7 (syn), 20.3 (anti), 29.4 (syn), 29.6 (anti), 43.1 (syn), 44.4 (anti), 53.2 (anti), 53.8 (syn), 77.8 (anti), 78.4 (syn), 128.0 (syn), 128.1 (syn), 128.17 (anti), 128.19 (anti), 129.05 (anti), 129.08 (syn), 136.2 (anti), 136.7 (syn), 203.2 (anti), 203.3 (syn);  $\nu$ (neat)/cm<sup>-1</sup> 3064, 3032, 2961, 2931, 2873, 2729, 1723, 1604, 1555, 1496, 1455, 1434, 1380, 1203, 1119, 1090, 990, 913, 844, 763, 703.

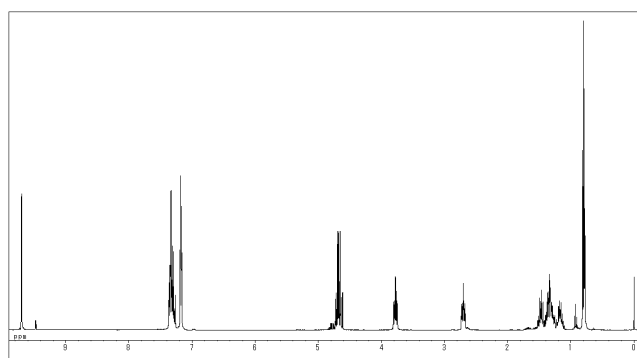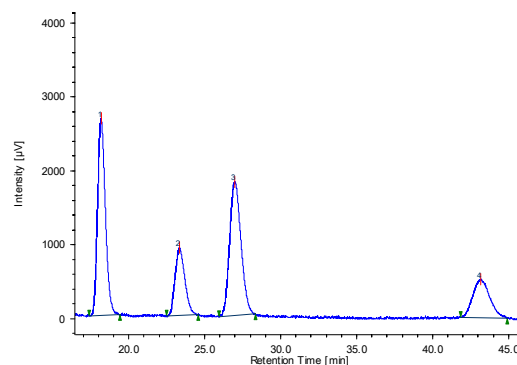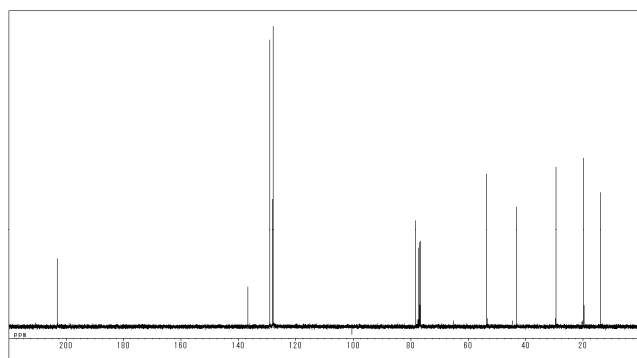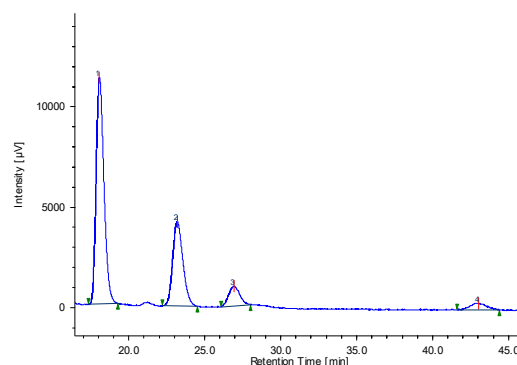

## 2-Methyl-2-(2-nitro-1-phenylethyl)pentanal (3t)<sup>5</sup>

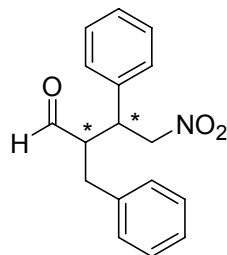

The enantioselectivity was determined by HPLC analysis [89% ee, DAICEL CHIRALCEL OD-H, 20% isopropanol/hexanes, 1.0 mL/min, 254 nm;  $t_r$ (major enantiomer, syn) = 32.7 min,  $t_r$ (major enantiomer, anti) = 38.2 min,  $t_r$ (minor enantiomer, syn) = 48.8 min,  $t_r$ (minor enantiomer, anti) = 60.8 min]. yellow oil,  $\delta_H$ (CDCl<sub>3</sub>): 2.73-3.15 (syn and anti) (4H, m), 3.80-3.87 (syn and anti) (1H, m), 4.70 (syn) and 4.74 (anti) (2H, dd,  $J$  8.5, 12.7 and 6.1, 12.7 Hz), 6.97-6.98 (syn) and 7.02-7.40 (syn and anti) (10H, m), 9.56 (anti) and 9.71 (syn) (1H, d,  $J$  2.0 and 2.4 Hz);  $\delta_C$ (CDCl<sub>3</sub>) 33.6 (anti), 34.2 (syn), 43.4 (syn), 44.4 (anti), 54.4 (anti), 55.3 (syn), 77.6 (anti), 78.0 (syn), [(126.9, 127.0, 128.1, 128.3, 128.4, 128.7, 128.8, 128.9, 129.1, 129.3, 136.7, 137.2) (syn and anti)], 203.0 (syn), 203.1 (anti);  $\nu$ (neat)/cm<sup>-1</sup> 3063, 3030, 2920, 2848, 2736, 1724, 1603, 1555, 1496, 1455, 1434, 1380, 1202, 1089, 1031, 913, 848, 759, 701.

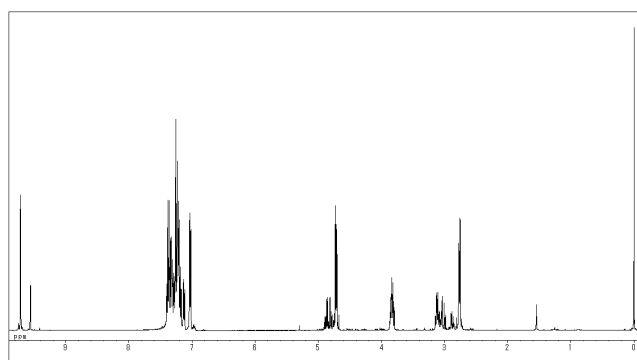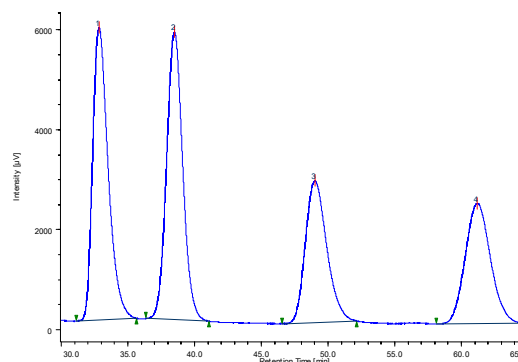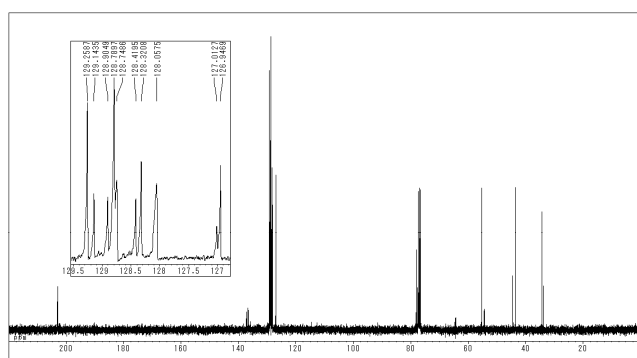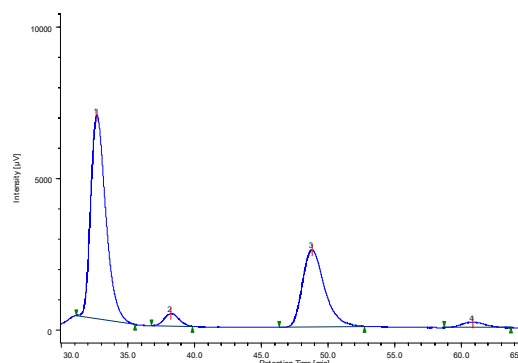

### (2*S*,3*R*)-2-(Prop-2-yl)-3-phenylbutanal (3u)

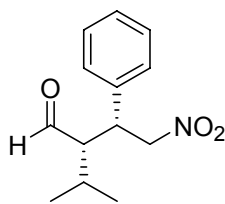

The enantioselectivity was determined by HPLC analysis [89% ee, DAICEL CHIRALPAK AS-H, 1% isopropanol/hexanes, 1.2 mL/min, 254 nm;  $t_r$ (major enantiomer, syn) = 31.6 min,  $t_r$ (minor enantiomer, syn) = 34.8 min,  $t_r$ (major enantiomer, anti) = 41.5 min,  $t_r$ (minor enantiomer, anti) = 49.3 min]. The absolute configuration was determined by

comparison of the optical rotation with that of the literature.<sup>2a</sup>  $[\alpha]^{22}_D = -41.9^\circ$  ( $c = 0.8$ ,  $\text{CHCl}_3$ ), light yellow oil, Characterization data for syn isomer:  $\delta_H(\text{CDCl}_3)$ : 0.88 (3H, d,  $J$  6.8 Hz), 1.10 (3H, d,  $J$  7.3 Hz), 1.68-1.76 (1H, m), 2.75-2.80 (1H, m), 3.87-3.93 (1H, m), 4.57 (1H, dd,  $J$  10.2, 12.7 Hz), 4.67 (1H, dd,  $J$  4.4, 12.7 Hz), 7.18-7.20 (2H, m), 7.27-7.36 (3H, m), 9.93 (1H, d,  $J$  2.4 Hz);  $\delta_C(\text{CDCl}_3)$  16.9, 21.6, 27.9, 41.9, 58.7, 79.0, 127.9, 128.1, 129.1, 137.0, 204.3;  $\nu(\text{neat})/\text{cm}^{-1}$  3058, 3031, 2964, 2921, 2875, 2742, 1717, 1604, 1553, 1496, 1456, 1432, 1379, 1241, 1206, 1144, 1110, 1073, 1031, 994, 913, 815, 760, 703.

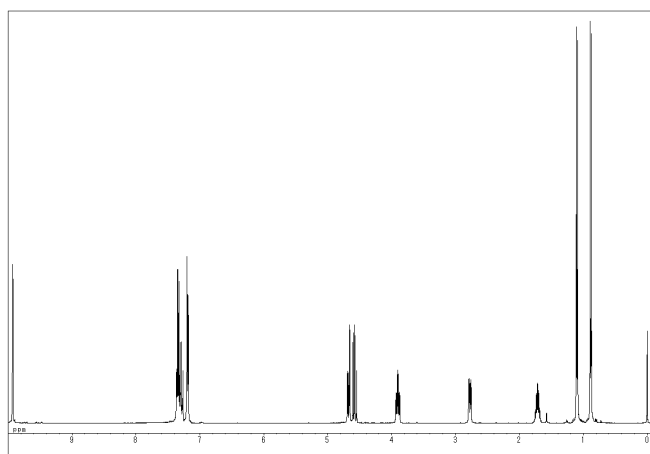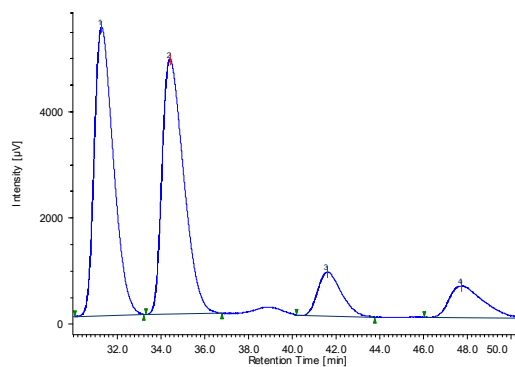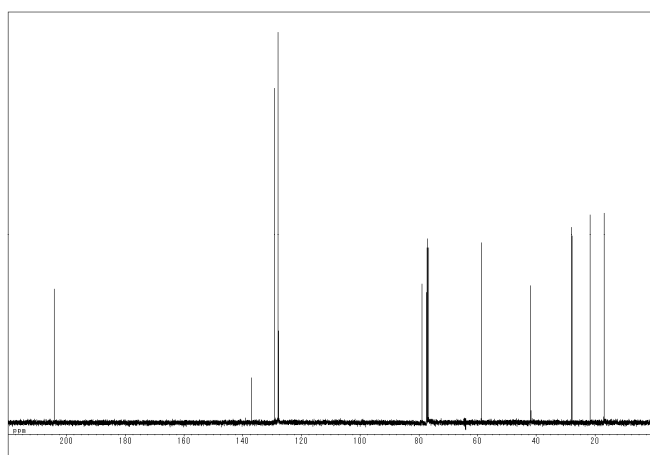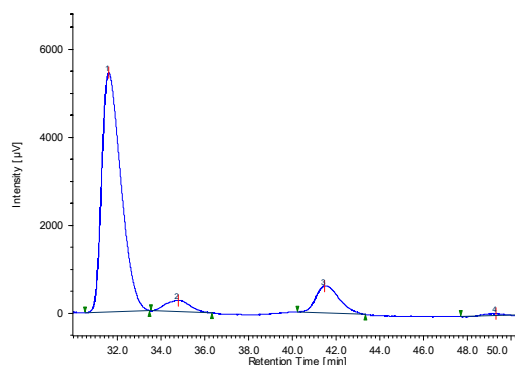

### (C) References

- 1 (a) Y. Xu, W. Zou, H. Sundén, I. Ibrahim, A. Córdova, *Adv. Synth. Catal.*, 2006, **348**, 418; (b) Y. Hayashi, H. Gotoh, T. Hayashi, M. Shoji, *Angew. Chem. Int. Ed.*, 2005, **44**, 4212; (c) N. Mase, R. Thayumanavan, F. Tanaka, C. F. Barbas, III, *Org. Lett.*, 2004, **6**, 2527; (d) M. P. Lalonde, Y. Chen, E. N. Jacobsen, *Angew. Chem. Int. Ed.*, 2006, **45**, 6366; (e) S. Mossé, A. Alexakis, *Org. Lett.*, 2006, **8**, 3577; (f) X.-J. Zhang, S.-P. Liu, X.-M. Li, M. Yan, A. S. C. Chan, *Chem. Commun.*, 2009, 833; (g) X.-J. Zhang, S.-P. Liu, J.-H. Lao, G.-J. Du, M. Yan, A. S. C. Chan, *Tetrahedron: Asymmetry*, 2009, **20**, 1451.
- 2 (a) S. H. McCooey, S. J. Connon, *Org. Lett.*, 2007, **9**, 599; (b) Y. Li, X.-Y. Liu, G. Zhao, *Tetrahedron: Asymmetry*, 2006, **17**, 2034.
- 3 C. Chang, S.-H. Li, R. J. Reddy, K. Chen, *Adv. Synth. Catal.*, 2009, **351**, 1273.
- 4 A. Alexakis, O. Andrey, *Org. Lett.*, 2002, **4**, 3611.
- 5 P. Kotrusz, S. Toma, H.-G. Schmalz, A. Adler, *Eur. J. Org. Chem.*, 2004, 1577.
